# Supplementary material
Source: HighWire-hosted journal article supplement (http://www.ghspjournal.org/highwire/filestream/1587/field_highwire_adjunct_files/0/FP-Resource-Materials-for-Implants-Training.zip)
Supplement: FP-Resource-Materials-for-Implants-Training.zip [file FP-Resource-Materials-for-Implants-Training.zip]

Archive with 5 entries (5 files):
- JADELLE TRAINING MANUAL FOR FP.pdf
- Module_3.pdf
- National FP Protocol.pdf
- JADELLE TRAINING MANUAL FOR FP CONT.pdf
- JADELLE TRAINING MANUAL FOR FP CONT2.pdf
